# Supplementary material for: Agro-Morphological and Molecular Characterization Reveal Deep Insights in Promising Genetic Diversity and Marker-Trait Associations in Fagopyrum esculentum and Fagopyrum tataricum
Source: MDPI journal article supplement (doi:10.3390/plants12183321), 2023-09-20
Supplement: s1 [file s1]

# Agro-Morphological and Molecular Characterization Reveal Deep Insights in Promising Genetic Diversity and Marker-Trait Associations in *Fagopyrum esculentum* and *Fagopyrum tataricum*

**Table S1.** The accessions of common buckwheat (*F. esculentum*) and Tartary buckwheat (*F. tataricum*) included in this agro-morphological and molecular characterization.

| ID  | Accession number  | Accession name            | Country of origin | Region  | Species                     |
|-----|-------------------|---------------------------|-------------------|---------|-----------------------------|
| 32  | 01Z5000137        | Pulawska II               | Poland            | Europe  | <i>Fagopyrum esculentum</i> |
| 11  |                   | KIS Doris                 | Slovenia          | Europe  | <i>Fagopyrum tataricum</i>  |
| 52  | SRGB 2258         | Dolina Krme na Gorenjskem | Slovenia          | Europe  | <i>Fagopyrum tataricum</i>  |
| 55  | SRGB 2224         | Osrednje Goričko          | Slovenia          | Europe  | <i>Fagopyrum tataricum</i>  |
| 56  | SRGB 2409         | Straža                    | Slovenia          | Europe  | <i>Fagopyrum tataricum</i>  |
| 58  | SRGB 2257         | Radohova vas              | Slovenia          | Europe  | <i>Fagopyrum tataricum</i>  |
| 59  | SRGB 2321         | Novo Mesto                | Slovenia          | Europe  | <i>Fagopyrum tataricum</i>  |
| 66  | SRGB 2337         |                           | Slovenia          | Europe  | <i>Fagopyrum tataricum</i>  |
| 68  | SRGB 2304         |                           | Slovenia          | Europe  | <i>Fagopyrum tataricum</i>  |
| 72  | SRGB 2356         |                           | Slovenia          | Europe  | <i>Fagopyrum tataricum</i>  |
| 77  | PI 658438         | Martin's Tarbary          | United States     | America | <i>Fagopyrum tataricum</i>  |
| 88  | PI 658430 00GI SD | G 32049                   | United States     | America | <i>Fagopyrum tataricum</i>  |
| 89  | PI 476852         | Madawaska                 | United States     | America | <i>Fagopyrum tataricum</i>  |
| 90  | PI 658429         | G 32048                   | United States     | America | <i>Fagopyrum tataricum</i>  |
| 122 | 01Z5100008        | PI 481670                 | Bhutan            | Asia    | <i>Fagopyrum tataricum</i>  |
| 124 | 01Z5100014        | PI 476852                 | United States     | America | <i>Fagopyrum tataricum</i>  |
| 127 | 01Z5100003        | PI 481646                 | Bhutan            | Asia    | <i>Fagopyrum tataricum</i>  |
| 128 | 01Z5100004        | PI 481652                 | Bhutan            | Asia    | <i>Fagopyrum tataricum</i>  |
| 131 | 01Z5100010        | Lifago                    | Germany           | Europe  | <i>Fagopyrum tataricum</i>  |
| 135 | 01Z5100037        | PI 481661                 | Bhutan            | Asia    | <i>Fagopyrum tataricum</i>  |

|     |                   |                  |                     |         |                             |
|-----|-------------------|------------------|---------------------|---------|-----------------------------|
| 143 | 01Z5100041        | Jianzui          | China               | Asia    | <i>Fagopyrum tataricum</i>  |
| 145 | 01Z5100044        | Zhaoqiao-1       | China               | Asia    | <i>Fagopyrum tataricum</i>  |
| 185 | UC0101691         | Peremoga         | Ukraine             | Europe  | <i>Fagopyrum tataricum</i>  |
| 121 | 01Z5100007        | PI 481659        | Bhutan              | Asia    | <i>Fagopyrum tataricum</i>  |
| 123 | 01Z5100013        | PI 451723        | Mexico              | America | <i>Fagopyrum tataricum</i>  |
| 126 | 01Z5100002        | PI 481645        | Bhutan              | Asia    | <i>Fagopyrum tataricum</i>  |
| 129 | 01Z5100006        | PI 481658        | Bhutan              | Asia    | <i>Fagopyrum tataricum</i>  |
| 130 | 01Z5100009        | PI 481671        | Bhutan              | Asia    | <i>Fagopyrum tataricum</i>  |
| 133 | 01Z5100019        | RCAT 068749      | unknown             | Unknown | <i>Fagopyrum tataricum</i>  |
| 136 | 01Z5100050        | Sarasin a Ployes | United States       | America | <i>Fagopyrum tataricum</i>  |
| 141 | 01Z5100012        |                  | Czech Republic      | Europe  | <i>Fagopyrum tataricum</i>  |
| 146 | 01Z5100046        | Jinqiao-2        | China               | Asia    | <i>Fagopyrum tataricum</i>  |
| 147 | 01Z5100030        | PI 427239        | Nepal               | Asia    | <i>Fagopyrum tataricum</i>  |
| 184 | UC0101690         | Lira             | Ukraine             | Europe  | <i>Fagopyrum tataricum</i>  |
| 108 | 01Z5000056        | 35273            | Germany             | Europe  | <i>Fagopyrum esculentum</i> |
| 3   |                   | Panda            | Russian Federation  | Eurasia | <i>Fagopyrum esculentum</i> |
| 18  | 01Z5000143        | CD 7272          | Czech Republic      | Europe  | <i>Fagopyrum esculentum</i> |
| 28  | 01Z5000112        | GEMA             | Poland              | Europe  | <i>Fagopyrum esculentum</i> |
| 95  | PI 658441 02GI SD | PA 001           | United States       | America | <i>Fagopyrum esculentum</i> |
| 165 | 01Z5000124        | Bongpyng         | unknown             | Unknown | <i>Fagopyrum esculentum</i> |
| 196 | UC0100149         |                  | Hungary             | Europe  | <i>Fagopyrum esculentum</i> |
| 2   |                   | Zoe              | Czech Republic      | Europe  | <i>Fagopyrum esculentum</i> |
| 5   |                   | Kora             | unknown             | Unknown | <i>Fagopyrum esculentum</i> |
| 6   |                   | HRUSZOWSKA       | Poland              | Europe  | <i>Fagopyrum esculentum</i> |
| 8   |                   | Billy            | Austria             | Europe  | <i>Fagopyrum esculentum</i> |
| 12  |                   | Zamira           | unknown             | Unknown | <i>Fagopyrum esculentum</i> |
| 14  | 01Z5000071        | Dozhdik          | Belarus             | Europe  | <i>Fagopyrum esculentum</i> |
| 19  | 01Z5000058        | BALLADA          | Former Soviet Union | Eurasia | <i>Fagopyrum esculentum</i> |

|     |            |                                       |                        |         |                                 |
|-----|------------|---------------------------------------|------------------------|---------|---------------------------------|
| 24  | 01Z5000072 | Sudtirol Nr. 3                        | unknown                | Unknown | <i>Fagopyrum<br/>esculentum</i> |
| 26  | 01Z5000017 | MONORI                                | unknown                | Unknown | <i>Fagopyrum<br/>esculentum</i> |
| 30  | 01Z5000049 | Yaita Zairai                          | Japan                  | Asia    | <i>Fagopyrum<br/>esculentum</i> |
| 31  | 01Z5000050 | Stoyoama Zairai                       | Japan                  | Asia    | <i>Fagopyrum<br/>esculentum</i> |
| 37  | 01Z5000067 | Chernigovskaya 17                     | Ukraine                | Europe  | <i>Fagopyrum<br/>esculentum</i> |
| 38  | 01Z5000004 | Chishiminskaya                        | Former Soviet<br>Union | Eurasia | <i>Fagopyrum<br/>esculentum</i> |
| 39  | 01Z5000006 | Krasnostreletska                      | Former Soviet<br>Union | Eurasia | <i>Fagopyrum<br/>esculentum</i> |
| 41  | 01Z5000051 | Botansoba                             | Japan                  | Asia    | <i>Fagopyrum<br/>esculentum</i> |
| 45  | 01Z5000063 | PYRA                                  | Czech Republic         | Europe  | <i>Fagopyrum<br/>esculentum</i> |
| 46  | 01Z5000113 | Lopfe                                 | unknown                | Unknown | <i>Fagopyrum<br/>esculentum</i> |
| 48  | 01Z5000001 | AELITA                                | Former Soviet<br>Union | Eurasia | <i>Fagopyrum<br/>esculentum</i> |
| 50  | 01Z5000013 | Alaya 846                             | Ukraine                | Europe  | <i>Fagopyrum<br/>esculentum</i> |
| 67  | SRGB 2265  | Gorenje Nekovo, Kanal                 | Slovenia               | Europe  | <i>Fagopyrum<br/>esculentum</i> |
| 71  | SRGB 2198  | Vrhtrebnje                            | Slovenia               | Europe  | <i>Fagopyrum<br/>esculentum</i> |
| 85  | PI 658436  | Martin's Alaska                       | United States          | America | <i>Fagopyrum<br/>esculentum</i> |
| 86  | PI 647601  | Nostrano                              | Italy                  | Europe  | <i>Fagopyrum<br/>esculentum</i> |
| 103 | 01Z5000118 | Podojlanka, Podolyanka                | Former Soviet<br>Union | Eurasia | <i>Fagopyrum<br/>esculentum</i> |
| 109 | 01Z5000057 | 53342                                 | Germany                | Europe  | <i>Fagopyrum<br/>esculentum</i> |
| 110 | 01Z5000062 | Bolshevik 4                           | Former Soviet<br>Union | Eurasia | <i>Fagopyrum<br/>esculentum</i> |
| 111 | 01Z5000025 | 8429                                  | unknown                | Unknown | <i>Fagopyrum<br/>esculentum</i> |
| 116 | 01Z5000012 | Shatilovskaya 5                       | Former Soviet<br>Union | Eurasia | <i>Fagopyrum<br/>esculentum</i> |
| 150 | 01Z5000139 | Silverhull 24                         | Canada                 | America | <i>Fagopyrum<br/>esculentum</i> |
| 167 | 01Z5000084 | Anita Beloruskaya                     | Ukraine                | Europe  | <i>Fagopyrum<br/>esculentum</i> |
| 169 | 01Z5000014 | UKRAJINSKAJA, Viktoriya<br>Podolskaya | Former Soviet<br>Union | Eurasia | <i>Fagopyrum<br/>esculentum</i> |
| 170 | 01Z5000008 | Maiskaya                              | Former Soviet<br>Union | Eurasia | <i>Fagopyrum<br/>esculentum</i> |
| 180 | UC0101319  |                                       | Ukraine                | Europe  | <i>Fagopyrum<br/>esculentum</i> |
| 197 | UC0100170  | Krupnoplodnaya                        | Russian Federation     | Eurasia | <i>Fagopyrum<br/>esculentum</i> |
| 200 | UC0100212  | Mestnyy 31                            | Lithuania              | Europe  | <i>Fagopyrum<br/>esculentum</i> |

|     |            |                        |                               |             |                                 |
|-----|------------|------------------------|-------------------------------|-------------|---------------------------------|
| 205 | UC0100281  |                        | France                        | Europe      | <i>Fagopyrum<br/>esculentum</i> |
| 207 | UC0100283  |                        | Sweden                        | Europe      | <i>Fagopyrum<br/>esculentum</i> |
| 215 | UC0100365  | CHornogorets'          | Belarus                       | Europe      | <i>Fagopyrum<br/>esculentum</i> |
| 217 | UC0100948  | MostÅşapaz             | Poland                        | Europe      | <i>Fagopyrum<br/>esculentum</i> |
| 226 | UC0101992  | Perlyna Podil's'ka     | Ukraine                       | Europe      | <i>Fagopyrum<br/>esculentum</i> |
| 239 | UC0102205  | Feniks                 | Belarus                       | Europe      | <i>Fagopyrum<br/>esculentum</i> |
| 36  | 01Z5000066 | Prego                  | Germany                       | Europe      | <i>Fagopyrum<br/>esculentum</i> |
| 158 | 01Z5000024 | 8428                   | unknown                       | Unknow<br>n | <i>Fagopyrum<br/>esculentum</i> |
| 216 | UC0100946  |                        | United States                 | America     | <i>Fagopyrum<br/>esculentum</i> |
| 1   |            | Zita                   | Czech Republic                | Europe      | <i>Fagopyrum<br/>esculentum</i> |
| 10  |            | KIS Čebelica           | Slovenia                      | Europe      | <i>Fagopyrum<br/>esculentum</i> |
| 15  | 01Z5000010 | Sibiryachka            | Former Soviet<br>Union        | Eurasia     | <i>Fagopyrum<br/>esculentum</i> |
| 20  | 01Z5000141 | Sweden-1               | Sweden                        | Europe      | <i>Fagopyrum<br/>esculentum</i> |
| 34  | 01Z5000133 | ROKSOLANA              | Russian Federation            | Eurasia     | <i>Fagopyrum<br/>esculentum</i> |
| 43  | 01Z5000060 | Sumcanka               | Former Soviet<br>Union        | Eurasia     | <i>Fagopyrum<br/>esculentum</i> |
| 73  | SRGB 5702  | SVNGOR 2010-14         | Slovenia                      | Europe      | <i>Fagopyrum<br/>esculentum</i> |
| 75  | SRGBTBA    | HUNORS 2010-9          | Slovenia                      | Europe      | <i>Fagopyrum<br/>esculentum</i> |
| 101 | 01Z5000064 | La Harpe               | France                        | Europe      | <i>Fagopyrum<br/>esculentum</i> |
| 113 | 01Z5000093 | JEZYK                  | unknown                       | Unknow<br>n | <i>Fagopyrum<br/>esculentum</i> |
| 119 | 01Z5000032 | PI 481632              | Bhutan                        | Asia        | <i>Fagopyrum<br/>esculentum</i> |
| 151 | 01Z5000022 | 4411                   | unknown                       | Unknow<br>n | <i>Fagopyrum<br/>esculentum</i> |
| 161 | 01Z5000121 | Rana 60                | Slovenia                      | Europe      | <i>Fagopyrum<br/>esculentum</i> |
| 168 | 01Z5000015 | Vita Galeya            | Former Soviet<br>Union        | Eurasia     | <i>Fagopyrum<br/>esculentum</i> |
| 182 | UC0101642  | DETERMINANT 2          | Ukraine                       | Europe      | <i>Fagopyrum<br/>esculentum</i> |
| 189 | UC0101942  |                        | Austria                       | Europe      | <i>Fagopyrum<br/>esculentum</i> |
| 203 | UC0100278  |                        | People's republic of<br>Korea | Asia        | <i>Fagopyrum<br/>esculentum</i> |
| 213 | UC0100362  | Bilorus'ka gomostil'na | Belarus                       | Europe      | <i>Fagopyrum<br/>esculentum</i> |
| 227 | UC0102165  | Kvyetka determinantna  | Belarus                       | Europe      | <i>Fagopyrum<br/>esculentum</i> |

|     |                       |                            |                            |         |                             |
|-----|-----------------------|----------------------------|----------------------------|---------|-----------------------------|
| 241 | 63 working collection | Aiva                       | People's republic of Korea | Asia    | <i>Fagopyrum esculentum</i> |
| 243 | 66                    | From Poland                | unknown                    | Unknown | <i>Fagopyrum esculentum</i> |
| 33  | 01Z5000131            | Ceska krajova              | Czech Republic             | Europe  | <i>Fagopyrum esculentum</i> |
| 53  | SRGB 2316             |                            | Slovenia                   | Europe  | <i>Fagopyrum tataricum</i>  |
| 54  | SRGB 2223             | Slovenj Gradec             | Slovenia                   | Europe  | <i>Fagopyrum tataricum</i>  |
| 83  | PI 503879 90GI SD     | Solider Pond               | United States              | America | <i>Fagopyrum tataricum</i>  |
| 87  | PI 658431             | G 32050                    | United States              | America | <i>Fagopyrum tataricum</i>  |
| 96  | PI 451723             | Trigo Saraceno O'Alforfon  | Mexico                     | America | <i>Fagopyrum tataricum</i>  |
| 132 | 01Z5100017            | Weswod Ican                | unknown                    | Unknown | <i>Fagopyrum tataricum</i>  |
| 138 | 01Z5100025            | 290                        | Bhutan                     | Asia    | <i>Fagopyrum tataricum</i>  |
| 139 | 01Z5100001            | PI 481644                  | Bhutan                     | Asia    | <i>Fagopyrum tataricum</i>  |
| 142 | 01Z5100028            | PA 160                     | unknown                    | Unknown | <i>Fagopyrum tataricum</i>  |
| 144 | 01Z5100042            | Liuqiao-3                  | China                      | Asia    | <i>Fagopyrum tataricum</i>  |
| 186 | UC0101692             | Kalya                      | Ukraine                    | Europe  | <i>Fagopyrum tataricum</i>  |
| 198 | UC0100180             |                            | China                      | Asia    | <i>Fagopyrum tataricum</i>  |
| 210 | UC0100291             |                            | India                      | Asia    | <i>Fagopyrum tataricum</i>  |
| 220 | UC0101037             |                            | Hungary                    | Europe  | <i>Fagopyrum tataricum</i>  |
| 234 | UC0100179             |                            | Ukraine                    | Europe  | <i>Fagopyrum giganteum</i>  |
| 44  | 01Z5000061            | SKOROSPELAJA,SKOROSPE LAYA | Former Soviet Union        | Eurasia | <i>Fagopyrum esculentum</i> |
| 64  | SRGB 2222             |                            | Slovenia                   | Europe  | <i>Fagopyrum esculentum</i> |
| 162 | 01Z5000048            | Takizawa Zairai            | Japan                      | Asia    | <i>Fagopyrum esculentum</i> |
| 166 | 01Z5000125            | Suwon #1                   | unknown                    | Unknown | <i>Fagopyrum esculentum</i> |
| 187 | UC0101906             | mistsevii 58               | Lithuania                  | Europe  | <i>Fagopyrum esculentum</i> |
| 212 | UC0100723             |                            | Belarus                    | Europe  | <i>Fagopyrum esculentum</i> |
| 214 | UC0100912             | Serebrista                 | Ukraine                    | Europe  | <i>Fagopyrum esculentum</i> |
| 232 | UC0102193             | Vlada                      | Belarus                    | Europe  | <i>Fagopyrum esculentum</i> |
| 9   |                       | KIS Eva                    | Slovenia                   | Europe  | <i>Fagopyrum esculentum</i> |
| 22  | 01Z5000129            | LUBA                       | Russian Federation         | Eurasia | <i>Fagopyrum esculentum</i> |

|     |                      |                           |                        |         |                                 |
|-----|----------------------|---------------------------|------------------------|---------|---------------------------------|
| 25  | 01Z5000140           | Tempest                   | Canada                 | America | <i>Fagopyrum<br/>esculentum</i> |
| 29  | 01Z5000046           | Iwate Zairai (MIDOU)      | Japan                  | Asia    | <i>Fagopyrum<br/>esculentum</i> |
| 40  | 01Z5000018           | Lehnicka krajova          | Slovakia               | Europe  | <i>Fagopyrum<br/>esculentum</i> |
| 47  | 01Z5000059           | KRUPINKA                  | Former Soviet<br>Union | Eurasia | <i>Fagopyrum<br/>esculentum</i> |
| 57  | SRGB 2285            | Kleče                     | Slovenia               | Europe  | <i>Fagopyrum<br/>esculentum</i> |
| 60  | SRGB 2296            | Brusnice, Novo Mesto      | Slovenia               | Europe  | <i>Fagopyrum<br/>esculentum</i> |
| 61  | SRGB 2207            | Slovenj Gradec            | Slovenia               | Europe  | <i>Fagopyrum<br/>esculentum</i> |
| 63  | SRGB 2305            | Jeprca, Medvode           | Slovenia               | Europe  | <i>Fagopyrum<br/>esculentum</i> |
| 65  | SRGB 2273            | Vojščica pri Kostanjevici | Slovenia               | Europe  | <i>Fagopyrum<br/>esculentum</i> |
| 76  | PI 658444            | Laharpe/PA 029            | France                 | Europe  | <i>Fagopyrum<br/>esculentum</i> |
| 80  | PI 647598            | Pulawska/PA 054           | Poland                 | Europe  | <i>Fagopyrum<br/>esculentum</i> |
| 93  | PI 658446 99GI<br>SD | Clfa 33                   | United States          | America | <i>Fagopyrum<br/>esculentum</i> |
| 97  | PI 647673            | Gornosorskaya             | Former Soviet<br>Union | Eurasia | <i>Fagopyrum<br/>esculentum</i> |
| 98  | PI 658447            | PA 002                    | United States          | America | <i>Fagopyrum<br/>esculentum</i> |
| 102 | 01Z5000115           | Kasanskaya                | Former Soviet<br>Union | Eurasia | <i>Fagopyrum<br/>esculentum</i> |
| 106 | 01Z5000040           | PI 481641                 | Bhutan                 | Asia    | <i>Fagopyrum<br/>esculentum</i> |
| 107 | 01Z5000074           | 832003                    | unknown                | Unknown | <i>Fagopyrum<br/>esculentum</i> |
| 115 | 01Z5000009           | Prikamskaya               | Former Soviet<br>Union | Eurasia | <i>Fagopyrum<br/>esculentum</i> |
| 117 | 01Z5000016           | LOCAL                     | unknown                | Unknown | <i>Fagopyrum<br/>esculentum</i> |
| 118 | 01Z5000030           | PI 481630                 | Bhutan                 | Asia    | <i>Fagopyrum<br/>esculentum</i> |
| 120 | 01Z5000117           | Demetra                   | Former Soviet<br>Union | Eurasia | <i>Fagopyrum<br/>esculentum</i> |
| 149 | 01Z5000138           | Tohno Zairai              | Canada                 | America | <i>Fagopyrum<br/>esculentum</i> |
| 152 | 01Z5000029           | PI 481629                 | Bhutan                 | Asia    | <i>Fagopyrum<br/>esculentum</i> |
| 157 | 01Z5000023           | 4419                      | unknown                | Unknown | <i>Fagopyrum<br/>esculentum</i> |
| 159 | 01Z5000094           | JUBILEJNAJA, Yubileina    | unknown                | Unknown | <i>Fagopyrum<br/>esculentum</i> |
| 163 | 01Z5000076           | Zelenocvetkovaya 90       | unknown                | Unknown | <i>Fagopyrum<br/>esculentum</i> |
| 164 | 01Z5000005           | Kalininskaya              | Former Soviet<br>Union | Eurasia | <i>Fagopyrum<br/>esculentum</i> |
| 177 | 01Z5000042           | PI 481643                 | Bhutan                 | Asia    | <i>Fagopyrum<br/>esculentum</i> |

|     |            |                            |                               |         |                                 |
|-----|------------|----------------------------|-------------------------------|---------|---------------------------------|
| 178 | UC0101155  | KOSMEYA                    | Ukraine                       | Europe  | <i>Fagopyrum<br/>esculentum</i> |
| 179 | UC0101182  |                            | Austria                       | Europe  | <i>Fagopyrum<br/>esculentum</i> |
| 190 | UC0101948  |                            | Ethiopia                      | Africa  | <i>Fagopyrum<br/>esculentum</i> |
| 191 | UC0101972  | AKADEMICHNA                | Ukraine                       | Europe  | <i>Fagopyrum<br/>esculentum</i> |
| 195 | UC0100100  | Hibridnaya                 | Russian Federation            | Eurasia | <i>Fagopyrum<br/>esculentum</i> |
| 199 | UC0100210  | Bogatyr                    | Russian Federation            | Eurasia | <i>Fagopyrum<br/>esculentum</i> |
| 204 | UC0100279  |                            | People's republic of<br>Korea | Asia    | <i>Fagopyrum<br/>esculentum</i> |
| 208 | UC0100285  | Tetraploidna               | Russian Federation            | Eurasia | <i>Fagopyrum<br/>esculentum</i> |
| 209 | UC0100280  |                            | France                        | Europe  | <i>Fagopyrum<br/>esculentum</i> |
| 211 | UC0100361  | Sadkom                     | Poland                        | Europe  | <i>Fagopyrum<br/>esculentum</i> |
| 221 | UC0101129  | Kara-Dag                   | Ukraine                       | Europe  | <i>Fagopyrum<br/>esculentum</i> |
| 223 | UC0100988  | Mig                        | Russian Federation            | Eurasia | <i>Fagopyrum<br/>esculentum</i> |
| 224 | UC0101092  | SKOROSTIGLA 86             | Russian Federation            | Eurasia | <i>Fagopyrum<br/>esculentum</i> |
| 236 | UC0101698  | Krupnoplodna SHertandins'k | Kazakhstan                    | Eurasia | <i>Fagopyrum<br/>esculentum</i> |
| 247 | 01Z5000135 | Bamby                      | Austria                       | Europe  | <i>Fagopyrum<br/>esculentum</i> |
| 248 | 01Z5000130 | Billy                      | Austria                       | Europe  | <i>Fagopyrum<br/>esculentum</i> |
| 21  | 01Z5000070 | Spacinska 1                | Slovakia                      | Europe  | <i>Fagopyrum<br/>esculentum</i> |
| 62  | SRGB 2266  | Krajna vas, Sežana         | Slovenia                      | Europe  | <i>Fagopyrum<br/>esculentum</i> |
| 78  | PI 647640  | CD 7272                    | Czech Republic                | Europe  | <i>Fagopyrum<br/>esculentum</i> |
| 114 | 01Z5000105 | Komsta                     | Former Soviet<br>Union        | Eurasia | <i>Fagopyrum<br/>esculentum</i> |
| 231 | UC0100177  | Emka                       | Poland                        | Europe  | <i>Fagopyrum<br/>esculentum</i> |
| 233 | UC0102207  | Ruslana                    | Ukraine                       | Europe  | <i>Fagopyrum<br/>esculentum</i> |
| 4   |            | Harpe                      | France                        | Europe  | <i>Fagopyrum<br/>esculentum</i> |
| 17  | 01Z5000052 | Hara Zairai                | Japan                         | Asia    | <i>Fagopyrum<br/>esculentum</i> |
| 27  | 01Z5000047 | Tokushima Zairai           | Japan                         | Asia    | <i>Fagopyrum<br/>esculentum</i> |
| 42  | 01Z5000069 | Vychodoslovenska krajova   | Slovakia                      | Europe  | <i>Fagopyrum<br/>esculentum</i> |
| 49  | 01Z5000007 | Lada                       | Former Soviet<br>Union        | Eurasia | <i>Fagopyrum<br/>esculentum</i> |
| 51  | 01Z5000111 | Emka                       | Poland                        | Europe  | <i>Fagopyrum<br/>esculentum</i> |

|     |                      |                            |                        |         |                                 |
|-----|----------------------|----------------------------|------------------------|---------|---------------------------------|
| 69  | SRGB 2270            | Temnica na Krasu           | Slovenia               | Europe  | <i>Fagopyrum<br/>esculentum</i> |
| 74  | SRGB 5553            | SVNDOL2007-41              | Slovenia               | Europe  | <i>Fagopyrum<br/>esculentum</i> |
| 81  | PI 263949            | PA 127                     | Serbia                 | Europe  | <i>Fagopyrum<br/>esculentum</i> |
| 82  | PI 647594            | Tokyo/PA 011               | Canada                 | America | <i>Fagopyrum<br/>esculentum</i> |
| 91  | PI 647638 12GI<br>SD | MC 060                     | Former Soviet<br>Union | Eurasia | <i>Fagopyrum<br/>esculentum</i> |
| 92  | PI 647603            | Sarrasin du Pays/PA 030    | France                 | Europe  | <i>Fagopyrum<br/>esculentum</i> |
| 94  | PI 658440            | Enka                       | Denmark                | Europe  | <i>Fagopyrum<br/>esculentum</i> |
| 99  | 01Z5000011           | Skorospelaya 81            | Former Soviet<br>Union | Eurasia | <i>Fagopyrum<br/>esculentum</i> |
| 104 | 01Z5000002           | Astoriya                   | Former Soviet<br>Union | Eurasia | <i>Fagopyrum<br/>esculentum</i> |
| 105 | 01Z5000037           | PI 481638                  | Bhutan                 | Asia    | <i>Fagopyrum<br/>esculentum</i> |
| 112 | 01Z5000092           | Kasanskaya,Kusanskaja      | Belarus                | Europe  | <i>Fagopyrum<br/>esculentum</i> |
| 125 | 01Z5000120           | Darja                      | Slovenia               | Europe  | <i>Fagopyrum<br/>esculentum</i> |
| 137 | 01Z5000020           | Orbita                     | unknown                | Unknown | <i>Fagopyrum<br/>esculentum</i> |
| 148 | 01Z5000119           | SIVA                       | Slovenia               | Europe  | <i>Fagopyrum<br/>esculentum</i> |
| 153 | 01Z5000038           | PI 481639                  | Bhutan                 | Asia    | <i>Fagopyrum<br/>esculentum</i> |
| 154 | 01Z5000039           | PI 481640                  | Bhutan                 | Asia    | <i>Fagopyrum<br/>esculentum</i> |
| 155 | 01Z5000043           | PI 482595                  | Zimbabwe               | Africa  | <i>Fagopyrum<br/>esculentum</i> |
| 156 | 01Z5000045           | PI 482597                  | Zimbabwe               | Africa  | <i>Fagopyrum<br/>esculentum</i> |
| 160 | 01Z5000041           | PI 481642                  | Bhutan                 | Asia    | <i>Fagopyrum<br/>esculentum</i> |
| 172 | 01Z5000021           | Slavyachka                 | Ukraine                | Europe  | <i>Fagopyrum<br/>esculentum</i> |
| 173 | 01Z5000068           | Viktoriya                  | Ukraine                | Europe  | <i>Fagopyrum<br/>esculentum</i> |
| 174 | 01Z5000100           | GREEN COROLLA 2            | unknown                | Unknown | <i>Fagopyrum<br/>esculentum</i> |
| 175 | 01Z5000122           | Darina                     | Slovenia               | Europe  | <i>Fagopyrum<br/>esculentum</i> |
| 176 | 01Z5000144           | CD 7273                    | unknown                | Unknown | <i>Fagopyrum<br/>esculentum</i> |
| 181 | UC0101496            | RADEKHIVS'KA<br>POLIPSHENA | Ukraine                | Europe  | <i>Fagopyrum<br/>esculentum</i> |
| 183 | UC0101679            |                            | Canada                 | America | <i>Fagopyrum<br/>esculentum</i> |
| 192 | UC0101979            | Malinka                    | Ukraine                | Europe  | <i>Fagopyrum<br/>esculentum</i> |
| 194 | UC0100115            | BOGATyR                    | Russian Federation     | Eurasia | <i>Fagopyrum<br/>esculentum</i> |



|     |            |                          |                               |         |                                 |
|-----|------------|--------------------------|-------------------------------|---------|---------------------------------|
| 201 | UC0100276  | Bol'shevik-Albaniya      | Albania                       | Europe  | <i>Fagopyrum<br/>esculentum</i> |
| 202 | UC0100277  |                          | Netherlands                   | Europe  | <i>Fagopyrum<br/>esculentum</i> |
| 206 | UC0100282  |                          | France                        | Europe  | <i>Fagopyrum<br/>esculentum</i> |
| 218 | UC0100949  | Olmemil'                 | People's republic of<br>Korea | Asia    | <i>Fagopyrum<br/>esculentum</i> |
| 219 | UC0101095  | Shinano1                 | Japan                         | Asia    | <i>Fagopyrum<br/>esculentum</i> |
| 222 | UC0100991  | Bilorus'ka odnostebel'na | Belarus                       | Europe  | <i>Fagopyrum<br/>esculentum</i> |
| 225 | UC0101109  | Gorets' vuz'kolistii     | Russian Federation            | Eurasia | <i>Fagopyrum<br/>esculentum</i> |
| 228 | UC0102185  | Shortandinskaya2         | Kazakhstan                    | Eurasia | <i>Fagopyrum<br/>esculentum</i> |
| 229 | UC0100348  | Zelenokvitkova 90        | Ukraine                       | Europe  | <i>Fagopyrum<br/>esculentum</i> |
| 230 | UC01002208 | Arno                     | Canada                        | America | <i>Fagopyrum<br/>esculentum</i> |
| 235 | UC0102114  | Marta                    | Belarus                       | Europe  | <i>Fagopyrum<br/>esculentum</i> |
| 237 | UC0102201  | Aresa                    | Belarus                       | Europe  | <i>Fagopyrum<br/>esculentum</i> |
| 238 | UC0102203  | Ametist                  | Belarus                       | Europe  | <i>Fagopyrum<br/>esculentum</i> |
| 240 | 64         | Nostran                  | unknown                       | Unknown | <i>Fagopyrum<br/>esculentum</i> |
| 244 | 01Z5000128 | Panda                    | Russian Federation            | Eurasia | <i>Fagopyrum<br/>esculentum</i> |
| 245 | 01Z5000095 | Kora                     | unknown                       | Unknown | <i>Fagopyrum<br/>esculentum</i> |
| 246 | 01Z5000065 | Hruszowska               | Poland                        | Europe  | <i>Fagopyrum<br/>esculentum</i> |
| 7   |            | Bamby                    | Austria                       | Europe  | <i>Fagopyrum<br/>esculentum</i> |
| 16  | 01Z5000055 | Arihira Zairai           | Japan                         | Asia    | <i>Fagopyrum<br/>esculentum</i> |
| 35  | 01Z5000134 | Rubra                    | Russian Federation            | Eurasia | <i>Fagopyrum<br/>esculentum</i> |
| 188 | UC0101927  |                          | Georgia                       | Eurasia | <i>Fagopyrum<br/>esculentum</i> |
| 193 | UC0101987  | KARMEN                   | Belarus                       | Europe  | <i>Fagopyrum<br/>esculentum</i> |
| 79  | PI 647612  | Clfa 38                  | United States                 | America | <i>Fagopyrum<br/>tataricum</i>  |
| 84  | PI 199769  | PA 160                   | United States                 | America | <i>Fagopyrum<br/>tataricum</i>  |
| 134 | 01Z5100011 | 903016                   | Pakistan                      | Asia    | <i>Fagopyrum<br/>tataricum</i>  |
| 140 | 01Z5100005 | PI 481656                | Bhutan                        | Asia    | <i>Fagopyrum<br/>tataricum</i>  |

**Table S2.** Descriptive statistics of the 37 qualitative traits in common buckwheat (*F. esculentum*) and Tartary buckwheat (*F. tataricum*).

| Trait                                   | Abbreviation | Class                 | <i>F. esculentum</i><br>(n=190) |       | <i>F. tataricum</i><br>(n=51) |       | Fisher's Exact |
|-----------------------------------------|--------------|-----------------------|---------------------------------|-------|-------------------------------|-------|----------------|
|                                         |              |                       | Frequency                       | H'    | Frequency                     | H'    |                |
| Cotyledon anthocyanin coloration        | COC          | Absent or very weak   | 66                              |       | 44                            |       |                |
|                                         |              | Medium                | 20                              | 0.986 | 1                             | 0.456 | 4.04E-10       |
|                                         |              | Strong                | 2                               |       | 0                             |       |                |
|                                         |              | Weak                  | 102                             |       | 6                             |       |                |
| Cotyledon/ seedling leaf colour         | CSCLC        | Green                 | 66                              |       | 44                            |       |                |
|                                         |              | Pink                  | 122                             | 0.7   | 7                             | 0.400 | 4.51E-11       |
|                                         |              | Red                   | 2                               |       | 0                             |       |                |
| Growth and branch shoot habit           | GBSH         | Erect longer          | 53                              |       | 22                            |       |                |
|                                         |              | Erect shorter         | 88                              | 1.240 | 18                            | 1.127 | 0.021          |
|                                         |              | Semi-erect longer     | 26                              |       | 10                            |       |                |
|                                         |              | Semi-erect shorter    | 23                              |       | 1                             |       |                |
| Leaf number                             | LNUM         | 1-3 leaves            | 78                              |       | 9                             |       |                |
|                                         |              | 8-12 leaves           | 107                             | 0.785 | 18                            | 1.028 | 0.000          |
|                                         |              | 13-15 leaves          | 5                               |       | 24                            |       |                |
| Time to maturity                        | MAT          | Early                 | 1                               |       | 0                             |       |                |
|                                         |              | Late                  | 128                             | 0.658 | 50                            | 0.097 | 1.32E-06       |
|                                         |              | Medium                | 61                              |       | 1                             |       |                |
| Lodging susceptibility                  | LSUS         | Intermediate          | 105                             |       | 20                            |       |                |
|                                         |              | Very susceptible      | 42                              | 0.998 | 5                             | 0.938 | 4.81E-04       |
|                                         |              | Very resistant        | 43                              |       | 26                            |       |                |
| Total number of flower clusters         | TNFC         | Few                   | 22                              |       | 0                             |       |                |
|                                         |              | Many                  | 44                              | 0.867 | 9                             | 0.466 | 8.01E-03       |
|                                         |              | Medium                | 124                             |       | 42                            |       |                |
| Stem anthocyanin coloration             | SAC          | Absent or weak        | 1                               |       | 22                            |       |                |
|                                         |              | Medium                | 73                              | 0.696 | 14                            | 1.248 | < 2.2E-16      |
|                                         |              | Strong                | 116                             |       | 4                             |       |                |
|                                         |              | Absent or weak/Medium | 0                               |       | 11                            |       |                |
| Nodes in stem                           | SNN          | Many                  | 174                             | 0.289 | 42                            | 0.466 | 0.070          |
|                                         |              | Medium                | 16                              |       | 9                             |       |                |
| Stem diameter                           | SDIA         | Large                 | 9                               |       | 2                             |       |                |
|                                         |              | Medium                | 136                             | 0.725 | 39                            | 0.652 | 0.875          |
|                                         |              | Small                 | 45                              |       | 10                            |       |                |
| Stem colour                             | STCOL        | Green                 | 0                               |       | 15                            |       |                |
|                                         |              | Green/Pink            | 7                               |       | 11                            |       |                |
|                                         |              | Green/Pink/Red        | 3                               | 0.924 | 0                             | 1.286 | < 2.2E-16      |
|                                         |              | Green/Red             | 92                              |       | 20                            |       |                |
|                                         |              | Pink                  | 1                               |       | 0                             |       |                |
|                                         |              | Red                   | 87                              |       | 5                             |       |                |
| Intensity of green colour in leaf blade | LBGC         | Dark                  | 144                             |       | 6                             |       |                |
|                                         |              | Light/Medium          | 2                               | 0.707 | 2                             | 1.039 | < 2.2E-16      |
|                                         |              | Medium                | 36                              |       | 30                            |       |                |
|                                         |              | Medium/Dark           | 8                               |       | 13                            |       |                |
| Leaf margin colour                      | LMCOL        | Green                 | 190                             | 0.000 | 18                            | 1.585 | < 2.2E-16      |

|                                              |       |                                |     |       |    |       |           |
|----------------------------------------------|-------|--------------------------------|-----|-------|----|-------|-----------|
|                                              |       | Green/Pink                     | 0   |       | 1  |       |           |
|                                              |       | Green/Red                      | 0   |       | 11 |       |           |
|                                              |       | Pink                           | 0   |       | 6  |       |           |
|                                              |       | Pink/Red                       | 0   |       | 6  |       |           |
|                                              |       | Red                            | 0   |       | 9  |       |           |
| Leaf vein colour                             | LVCOL | Green                          | 14  |       | 3  |       |           |
|                                              |       | Green/Pink                     | 88  |       | 24 |       |           |
|                                              |       | Green/Pink/Red                 | 9   | 1.170 | 2  | 1.011 | 0.870     |
|                                              |       | Green/Red                      | 73  |       | 22 |       |           |
|                                              |       | Red                            | 6   |       | 0  |       |           |
| Petiole colour                               | PCOL  | Green/Pink                     | 80  |       | 34 |       |           |
|                                              |       | Green/Pink/Red                 | 27  |       | 10 |       |           |
|                                              |       | Green/Red                      | 82  | 1.032 | 2  | 0.944 | < 2.2E-16 |
|                                              |       | Red                            | 1   |       | 0  |       |           |
|                                              |       | Green                          | 0   |       | 5  |       |           |
| Leaf blade shape                             | LBS   | Cordate                        | 3   |       | 0  |       |           |
|                                              |       | Hastate                        | 28  |       | 20 |       |           |
|                                              |       | Hastate/Cordate                | 42  | 1.607 | 2  | 1.209 | < 2.2E-16 |
|                                              |       | Hastate/Sagittate              | 62  |       | 15 |       |           |
|                                              |       | Sagittate                      | 33  |       | 14 |       |           |
|                                              |       | Sagittate/Cordate              | 24  |       | 0  |       |           |
| Inflorescence: anthocyanin coloration of bud | IAC   | Absent or very weak            | 48  |       | 18 |       |           |
|                                              |       | Medium                         | 25  | 1.105 | 8  | 1.253 | 0.163     |
|                                              |       | Strong                         | 11  |       | 5  |       |           |
|                                              |       | Weak                           | 106 |       | 20 |       |           |
| Branched inflorescence                       | BINF  | No                             | 6   | 0.14  | 7  | 0.400 | 7.87E-03  |
|                                              |       | Yes                            | 184 |       | 44 |       |           |
| Colour of inflorescence stalk                | CINFS | Green                          | 136 |       | 11 |       |           |
|                                              |       | Green/Pink                     | 54  |       | 10 |       |           |
|                                              |       | Green/Red                      | 0   | 0.597 | 1  | 1.191 | < 2.2E-16 |
|                                              |       | Pink/Red                       | 0   |       | 2  |       |           |
|                                              |       | Red                            | 0   |       | 27 |       |           |
| Flower colour                                | FCOL  | Greenish-yellow                | 1   |       | 20 |       |           |
|                                              |       | Pink                           | 2   |       | 0  |       |           |
|                                              |       | Pink/Red                       | 1   |       | 0  |       |           |
|                                              |       | White                          | 159 | 0.567 | 0  | 0.756 | < 2.2E-16 |
|                                              |       | White/Greenish-yellow          | 25  |       | 0  |       |           |
|                                              |       | White/Pink                     | 2   |       | 0  |       |           |
|                                              |       | Greenish-yellow/Pink           | 0   |       | 30 |       |           |
|                                              |       | Greenish-yellow/Red            | 0   |       | 1  |       |           |
| Flower morphology                            | FMOR  | Stamens as long as style       | 7   |       | 51 |       |           |
|                                              |       | Stamens longer style           | 107 | 0.811 | 0  | 0.000 | < 2.2E-16 |
|                                              |       | Stamens shorter than style     | 76  |       | 0  |       |           |
| Compactness of inflorescence                 | CINF  | Cyme semi-compact              | 70  |       | 0  |       |           |
|                                              |       | Cyme semi-compact/Cyme compact | 50  | 1.436 | 0  | 0.000 | < 2.2E-16 |
|                                              |       | Cyme compact                   | 16  |       | 0  |       |           |
|                                              |       | Cyme loose                     | 12  |       | 51 |       |           |

|              |      |                              |     |       |    |       |           |
|--------------|------|------------------------------|-----|-------|----|-------|-----------|
|              |      | Cyme loose/Cyme semi-compact | 42  |       | 0  |       |           |
| Seed: shape  | SSH  | Elliptic                     | 2   | 0.117 | 33 | 0.808 | < 2.2E-16 |
|              |      | Ovate                        | 2   |       | 15 |       |           |
|              |      | Trullate                     | 186 |       | 3  |       |           |
| Seed surface | SS   | Irregular                    | 1   | 0.033 | 51 | 0.000 | < 2.2E-16 |
|              |      | Smooth                       | 189 |       | 0  |       |           |
| Seed colour  | SCOL | Brown                        | 8   |       | 46 |       |           |
|              |      | Brown/Black                  | 3   |       | 1  |       |           |
|              |      | Brown/Black/Mottled          | 3   |       | 0  |       |           |
|              |      | Brown/Mottled                | 136 |       | 0  |       |           |
|              |      | Grey                         | 5   | 1.136 | 0  | 0.370 | 5.00E-04  |
|              |      | Grey/Brown                   | 2   |       | 4  |       |           |
|              |      | Grey/Brown/Mottled           | 12  |       | 0  |       |           |
|              |      | Grey/Mottled                 | 7   |       | 0  |       |           |
|              |      | Mottled                      | 14  |       | 0  |       |           |
| Mean         |      |                              |     | 0.773 |    | 0.749 |           |

H', Shannon-Weaver diversity index.

**Table S3.** List of the 24 SSR markers used for genetic diversity analysis of common buckwheat (*F. esculentum*) and Tartary buckwheat (*F. tataricum*).

| SSR marker | M13 label | Forward sequence        | Reverse sequence        | Tm (touch-down conditions/decreased T per cycle) | Species of origin    |
|------------|-----------|-------------------------|-------------------------|--------------------------------------------------|----------------------|
| Fem1303    | FAM       | AGGAGACGGGAGAGAAG CAG   | GGATGTTTGGGTGATTTC AG   | from 60°C to 49.5°C for 0.7 °C                   | <i>F. esculentum</i> |
| Fem1322    | NED       | AAGCATTCATTCATTCAT TC   | GAGTTTGTGTGTTTGA GG     | from 60°C to 49.5°C for 0.7 °C                   | <i>F. esculentum</i> |
| Fem1407    | HEX       | GTGATGAGTAGTTGCCTC TG   | CTTGGCTTAGACCTCTCG TA   | from 60°C to 49.5°C for 0.7 °C                   | <i>F. esculentum</i> |
| Fem1582    | FAM       | TCTGGAGAAGCTAAACC CAC   | CCGCAGTTTGTAGGGAGG GA   | from 62 °C to 51.5°C for 0.7 °C                  | <i>F. esculentum</i> |
| Fem1840    | NED       | ACGACGAAGACAAATGA GGA   | ATATGGACGGCCTGGATT AT   | from 60°C to 49.5°C for 0.7 °C                   | <i>F. esculentum</i> |
| SXAU048    | HEX       | TCCTAGCCTCTTAGGTTA AGG  | TTCTAACCGATGTCAAAC CAC  | from 62 °C to 51.5°C for 0.7 °C                  | <i>F. tataricum</i>  |
| SXAU060    | FAM       | TCCCAATAGCCAATAGTA CATG | GACCTAATTAACCGTTAG CACA | from 60°C to 49.5°C for 0.7 °C                   | <i>F. tataricum</i>  |
| SXAU089    | NED       | CAAAAGAAAAGTGCCGA AGT   | TTATGTACCCGCCATTGTT     | from 60°C to 49.5°C for 0.7 °C                   | <i>F. tataricum</i>  |
| SXAU129    | HEX       | CTCAAAGGATGCCATTGT AAC  | GACTTTGAGAACGCCTTG AC   | from 60°C to 49.5°C for 0.7 °C                   | <i>F. tataricum</i>  |
| SXAU138    | FAM       | CACCTGCTACAATACTCT CA   | GCTTAATCAACAGTAGGC AC   | from 60°C to 49.5°C for 0.7 °C                   | <i>F. tataricum</i>  |
| Ft1_114    | NED       | CAACAGCATCTTTCCCTT CA   | CCATAAACACAGCAACA GCC   | from 62 °C to 51.5°C for 0.7 °C                  | <i>F. tataricum</i>  |
| Ft2_1743   | HEX       | ACCACTGACAATAAGGG GGA   | CAAAAGGTTGATGTGGAT GG   | from 60°C to 49.5°C for 0.7 °C                   | <i>F. tataricum</i>  |
| Ft3_572    | FAM       | CATCACCCCTCTCAAGAC CT   | AGAATCCTACCCCGTCCT TT   | from 60°C to 49.5°C for 0.7 °C                   | <i>F. tataricum</i>  |
| Ft4_2725   | NED       | TAGCGATTTGAAGGGGA CTT   | CGTAACAATGGTCGTTAC TCG  | from 60°C to 49.5°C for 0.7 °C                   | <i>F. tataricum</i>  |
| Ft5_2899   | HEX       | AAGCTTCCTTCCATGACC AC   | GTTTCTTGTGTGGACCGTT G   | from 60°C to 49.5°C for 0.7 °C                   | <i>F. tataricum</i>  |

|           |     |                                                |                                 |                      |
|-----------|-----|------------------------------------------------|---------------------------------|----------------------|
| Ft6_2849  | FAM | ACAATTCATCAAGCGACT CTTTGCCGAATGTAGGGA<br>CC AT | from 60°C to 49.5°C for 0.7 °C  | <i>F. tataricum</i>  |
| Ft7_382   | NED | TGGTCTCTAAAACGGACC TCGGAACCGGATTCTCTT<br>GA AC | from 60°C to 49.5°C for 0.7 °C  | <i>F. tataricum</i>  |
| Ft8_605   | HEX | AACGAGGGTACTAACCG CCCCAGCTGTAAAACAAT<br>GAA CA | from 60°C to 49.5°C for 0.7 °C  | <i>F. tataricum</i>  |
| GB-FE-025 | FAM | CAGATGTTACCCGAGGCAACCCATATGTCACGAGCG           | from 62 °C to 51.5°C for 0.7 °C | <i>F. esculentum</i> |
| GB-FE-121 | NED | TCCATACCAAGCAGGTGG GTGCCTGATGAGGTTCCA          | from 60°C to 49.5°C for 0.7 °C  | <i>F. esculentum</i> |
| GB-FE-035 | HEX | TGCAATGACTTGAGGA ACCACCATTCAACAAGC<br>GA G     | from 60°C to 49.5°C for 0.7 °C  | <i>F. esculentum</i> |
| GB-FE-054 | FAM | TGTTGGACTTCCTAGACC CATGAAAAGGGGATGCA<br>TG A   | from 62 °C to 51.5°C for 0.7 °C | <i>F. esculentum</i> |
| TBP5      | NED | GGGGATTGATCGAGAAA CCGAAGAGTAACTAGGA<br>G C     | from 60°C to 49.5°C for 0.7 °C  | <i>F. tataricum</i>  |
| TBP6      | HEX | CGGCTAATAAGTCGTTTC GGATCATAGGTCGTGAAT          | from 60°C to 49.5°C for 0.7 °C  | <i>F. tataricum</i>  |

**Table S4.** Correlation matrices of the 37 agro-morphological traits based on Spearman's coefficient in *F. esculentum* (above the diagonal) and *F. tataricum* (below the diagonal). Only significant correlations are shown ( $p < 0.01$ ).

|           | CO    | CSCL  | GBS   | LNU   | MA    | LSU   | TNF   | SA    | SN    | SDI   | STCO  | LBG   | LMC   | LVC   | PCO   | LBS   | IAC   | BIN   | CINF  | FCO   | FMO   | CINF  | SSH   | SS    | SCO   | SL    | SW    | TS    | PH    | PL    | LBL   | LB    | DF    | LC    | NFC   | NC    | GE    |
|-----------|-------|-------|-------|-------|-------|-------|-------|-------|-------|-------|-------|-------|-------|-------|-------|-------|-------|-------|-------|-------|-------|-------|-------|-------|-------|-------|-------|-------|-------|-------|-------|-------|-------|-------|-------|-------|-------|
|           | C     | C     | H     | M     | T     | S     | C     | C     | N     | A     | L     | C     | OL    | OL    | L     |       |       | F     | S     | L     | R     | F     |       |       | L     |       |       | W     |       |       |       | W     |       |       | C     | P     | R     |
| COC       | 1.00  | 0.88  | 0.06  | -0.28 | 0.05  | -0.04 |       | 0.04  | 0.02  | 0.21  |       |       |       | 0.05  | 0.11  | 0.05  | 0.05  | -0.06 | 0.06  | 0.07  | -0.06 | 0.09  | 0.12  | -0.07 | -0.09 | 0.07  | -0.04 | -0.08 | -     | -     | -     | -0.07 | -     | -     | -0.25 | -0.07 | -0.04 |
| CSCL<br>C | 0.98  | 1.00  | 0.11  | -0.24 | 0.05  | -0.01 | 0.02  | 0.02  | 0.01  | 0.19  |       |       |       | 0.09  | 0.11  | 0.03  | 0.07  | -0.06 | 0.12  | 0.11  | -0.05 | 0.09  | 0.14  | -0.05 | -0.14 | 0.09  |       | -0.02 |       | -     | -     | -0.07 | 0.02  | -     | -0.21 | -0.03 | -0.05 |
| GBSH      | -0.05 | 0.03  | 1.00  | 0.04  | -0.02 | -0.05 | 0.04  | -0.12 | 0.09  |       |       | -0.05 |       | -0.02 | -0.03 | 0.12  | -0.03 | -0.08 | -0.15 | -0.05 | 0.04  | -0.15 | 0.06  |       | -0.12 | 0.07  | 0.16  | 0.14  | -0.16 | -0.05 | 0.08  | -0.05 | 0.11  | -0.06 | -0.04 | 0.05  |       |
| LNU<br>M  | -0.18 | -0.18 | -0.04 | 1.00  | -0.38 | -0.01 | -0.02 | -0.08 | -0.13 | -0.18 |       | -0.06 |       | 0.08  | -0.03 | 0.15  | -0.03 | -0.10 | 0.12  | 0.06  | -0.03 | -0.12 | 0.09  |       | 0.02  | 0.09  | 0.06  | 0.12  | 0.18  | 0.05  | 0.15  | 0.12  | 0.07  | 0.16  | 0.06  | -0.04 |       |
| MAT       | -0.06 | -0.06 | 0.03  | -0.24 | 1.00  |       | -0.02 | 0.02  | -0.08 | 0.10  | -0.04 | 0.19  |       | -0.06 | -0.16 | -0.07 | 0.01  | 0.17  | -0.07 | -0.04 | 0.01  |       | -0.10 | -0.04 | 0.10  | -0.04 | 0.06  | 0.04  | -0.05 | -0.21 | -0.11 | -0.17 | -0.35 | -0.13 | -0.08 | -0.09 | -0.08 |
| LSUS      | -0.08 | -0.11 | -0.25 | 0.15  | 0.13  | 1.00  | -0.05 | 0.07  | 0.03  | -0.02 | 0.14  | -0.03 |       | 0.08  |       | 0.06  | 0.13  | 0.04  | 0.09  | 0.04  |       | 0.19  | 0.06  | 0.06  | 0.12  | -0.02 | -0.04 |       | 0.03  |       | 0.01  | 0.01  | -0.07 | 0.02  | 0.07  |       | 0.05  |
| TNFC      | -0.29 | -0.26 | 0.01  | -0.03 | 0.07  | -0.32 | 1.00  | -0.13 | -0.02 |       | 0.07  |       |       | 0.01  | 0.02  | 0.06  | -0.12 | 0.00  | 0.04  | 0.01  | -0.08 | 0.07  | -0.05 | 0.03  | -0.13 | 0.10  | -0.13 | 0.06  | -0.03 | -0.06 | -0.02 |       | -0.04 | 0.05  | -0.08 |       |       |
| SAC       | 0.09  | 0.11  | -0.10 | 0.03  |       | -0.10 | -0.05 | 1.00  | 0.01  |       | 0.61  | -0.14 |       | 0.20  | 0.29  |       | 0.07  | -0.08 | 0.12  | -0.08 | 0.12  | 0.02  | -0.06 | -0.06 | 0.01  | 0.04  | -0.05 | 0.03  | 0.10  | -0.09 | -0.09 | -0.13 | -0.09 | -0.05 | 0.02  | 0.07  | -0.10 |
| SNN       | -0.18 | -0.18 | 0.61  | 0.03  | -0.07 | -0.17 | 0.21  | -0.25 | 1.00  | 0.15  | -0.05 |       |       | -0.07 | 0.05  | 0.06  | 0.02  | -0.16 | -0.07 | 0.06  | 0.18  | -0.06 | 0.04  | 0.02  | 0.08  | -0.15 | 0.09  | -0.10 | -0.53 | -0.15 | -0.28 | -0.31 | 0.09  | -0.19 | -0.26 | 0.28  | 0.36  |
| SDIA      | -0.13 | -0.14 | 0.50  | -0.27 | -0.05 | -0.22 | 0.16  | -0.04 | 0.63  | 1.00  | -0.02 | 0.11  |       | -0.14 | 0.05  | -0.08 | 0.01  | 0.13  | 0.11  | 0.12  | -0.02 | 0.09  | 0.15  | 0.03  | -0.07 | -0.06 | -0.11 | 0.17  | -0.11 | 0.03  | -0.20 | -0.09 | -0.14 | -0.18 | -0.05 | 0.13  |       |
| STCO<br>L | 0.10  | 0.11  | -0.10 | -0.07 | 0.10  |       | -0.22 | 0.66  | -0.24 | -0.10 | 1.00  | -0.24 |       | 0.18  | 0.39  |       | 0.10  | -0.03 | 0.12  | -0.02 | 0.07  | -0.07 | -0.06 | 0.05  | 0.06  | 0.06  | -0.02 | 0.09  | -0.10 | 0.08  | -0.07 | 0.01  | -0.08 | 0.06  | -0.03 | -0.14 |       |
| LBGC      | -0.40 | -0.38 | 0.02  |       | -0.04 | 0.11  | -0.24 | 0.01  | 0.06  | -0.06 | 1.00  |       |       | -0.24 | -0.34 | 0.02  | 0.10  | 0.16  | -0.03 | 0.01  | -0.09 | 0.03  | 0.04  | -0.06 | 0.05  | 0.02  |       | -0.04 | -0.15 | -0.07 | -0.16 | -0.16 | 0.10  | -0.09 | -0.03 | 0.09  |       |
| LMC<br>OL | 0.16  | 0.15  | -0.02 | 0.04  | 0.06  | 0.04  | -0.10 | 0.24  | 0.02  | -0.07 | 0.14  | -0.09 | 1.00  |       |       |       |       |       |       |       |       |       |       |       |       |       |       |       |       |       |       |       |       |       |       |       |       |
| LVC<br>OL | 0.37  | 0.38  | -0.01 | -0.07 | 0.16  | -0.06 | -0.17 | 0.28  | -0.13 | 0.01  | 0.08  | -0.24 | 0.17  | 1.00  | 0.20  |       | 0.08  | -0.08 | 0.09  | 0.04  | 0.03  | 0.10  | -0.02 | -0.01 | 0.04  | -0.05 | -0.01 | -0.04 | 0.13  | -0.01 |       | 0.08  | -0.17 | 0.01  | 0.02  | 0.05  | -0.20 |
| PCOL      | 0.31  | 0.33  | 0.25  | -0.07 | -0.04 | -0.13 | -0.19 | 0.39  | 0.03  | 0.04  | 0.41  | -0.24 | 0.30  | 0.30  | 1.00  | 0.10  | 0.08  | -0.12 | 0.05  | 0.01  | 0.01  | -0.02 | 0.05  | -0.08 | 0.07  | 0.03  | 0.04  | 0.07  | -0.07 | 0.06  | 0.03  | 0.06  | 0.02  | -0.03 | -0.07 | -0.13 |       |
| LBS       | -0.12 | -0.14 | 0.09  | 0.18  | 0.17  | 0.20  | 0.13  | 0.06  | 0.12  | -0.02 |       | 0.38  | 0.39  | 0.13  | 0.05  | 1.00  | -0.02 |       | -0.02 | 0.07  | -0.02 | 0.11  | -0.07 | 0.05  | 0.17  | 0.25  | 0.25  | 0.02  | 0.05  | -0.06 | -0.02 | 0.04  | -0.04 | -0.03 | -0.03 |       |       |
| IAC       | 0.21  | 0.23  | -0.43 | 0.05  | -0.16 | 0.17  | -0.32 | 0.13  | -0.42 | -0.30 | 0.31  | 0.18  | -0.03 | 0.17  | -0.06 | 0.00  | 1.00  | 0.04  | 0.15  | 0.06  | -0.02 | 0.19  | -0.08 | -0.06 | 0.03  | 0.09  | 0.04  | 0.10  | 0.04  | -0.11 | -0.17 | -0.16 | -0.03 | 0.02  | 0.05  | 0.05  | 0.08  |
| BINF      | 0.16  | 0.16  | -0.58 | -0.14 | 0.06  | 0.23  | -0.18 | 0.28  | -0.71 | -0.36 | 0.23  |       | -0.15 | 0.05  | -0.24 | -0.17 | 0.46  | 1.00  | 0.05  | 0.06  | -0.04 | 0.26  | -0.03 | 0.40  | -0.03 | -0.03 | -0.18 | -0.13 | 0.19  | 0.11  | 0.17  | 0.09  | 0.03  | 0.42  | 0.43  | -0.15 | -0.09 |

|           |       |       |       |       |       |       |       |       |       |       |       |       |       |       |       |      |       |       |       |       |       |       |       |       |       |       |       |       |       |       |       |       |       |       |       |       |
|-----------|-------|-------|-------|-------|-------|-------|-------|-------|-------|-------|-------|-------|-------|-------|-------|------|-------|-------|-------|-------|-------|-------|-------|-------|-------|-------|-------|-------|-------|-------|-------|-------|-------|-------|-------|-------|
| CINF<br>S | -0.02 | -0.04 | -0.52 | -0.16 | 0.12  | 0.23  | -0.14 | 0.07  | -0.48 | -0.32 | 0.28  | 0.28  | 0.16  | -0.14 | -0.23 | 0.16 | 0.40  | 0.50  | 1.00  | -0.05 | -0.03 | 0.17  | 0.09  | 0.05  | -0.15 | 0.06  | -0.08 | -0.11 | 0.10  | -0.13 | 0.04  | -0.08 | -0.15 | -0.16 | -0.02 | 0.04  |
| FCOL      | 0.11  | 0.07  | -0.58 | -0.19 | -0.17 | 0.25  | -0.13 | 0.33  | -0.46 | -0.25 | 0.44  | -0.02 | 0.16  | 0.07  | 0.14  | 0.05 | 0.49  | 0.48  | 0.50  | 1.00  | 0.04  | 0.05  | 0.04  | 0.02  | -0.08 | -0.01 | 0.02  | -0.04 | 0.05  | -0.08 | 0.02  | 0.05  | 0.05  | 0.07  | 0.04  | -0.06 |
| FMO<br>R  |       |       |       |       |       |       |       |       |       |       |       |       |       |       |       |      |       |       |       | 1.00  | -0.03 | 0.09  | -0.08 | 0.10  | -0.02 | 0.08  | 0.04  | -0.02 | -0.03 | -0.08 | -0.02 | 0.05  | 0.02  | 0.04  | 0.03  |       |
| CINF      |       |       |       |       |       |       |       |       |       |       |       |       |       |       |       |      |       |       |       |       | 1.00  | -0.02 | 0.10  | 0.00  | 0.03  | -0.06 | 0.02  | 0.28  | -0.04 | 0.16  | 0.13  | -0.12 | 0.18  | 0.25  | -0.01 |       |
| SSH       | 0.23  | 0.20  | 0.40  | 0.06  | -0.10 | -0.16 | -0.03 | 0.06  | 0.37  | 0.26  | 0.03  | -0.28 | 0.05  | -0.05 | 0.37  | 0.12 | -0.39 | -0.47 | -0.20 |       | 1.00  | -0.01 | 0.02  | -0.02 | 0.06  | 0.01  | -0.09 | 0.03  | 0.03  | -0.03 | -0.06 | -0.01 | 0.02  | -0.03 |       |       |
| SS        |       |       |       |       |       |       |       |       |       |       |       |       |       |       |       |      |       |       |       |       | 1.00  | 0.02  | 0.00  | -0.07 | -0.12 | 0.05  | 0.05  | 0.06  | -0.03 | 0.02  | 0.09  | -0.07 | 0.02  |       |       |       |
| SCOL      | 0.31  | 0.29  | 0.16  | 0.02  | -0.05 | -0.08 | -0.23 | 0.42  | -0.15 | -0.11 | 0.26  | -0.20 | 0.35  | 0.08  | 0.46  | 0.14 | -0.08 | -0.17 | 0.09  | 0.55  | 1.00  | -0.06 | 0.09  | 0.09  | -0.04 | 0.15  | 0.05  | 0.06  | -0.07 | 0.05  | -0.10 |       |       |       |       |       |
| SL        | -0.32 | -0.30 |       | 0.37  | -0.39 | -0.20 | 0.16  | 0.01  | -0.11 | -0.02 | 0.40  | 0.02  | -0.19 | 0.10  | -0.13 | 0.05 | -0.13 |       |       |       | 1.00  | -0.03 | 0.73  | 0.62  | 0.09  | -0.08 | 0.13  | -0.09 | 0.13  | -0.09 | -0.11 | -0.14 | 0.10  |       |       |       |
| SW        | 0.06  | 0.05  | 0.27  | 0.44  | -0.56 | -0.27 | 0.01  | -0.10 | 0.30  | 0.07  | -0.20 | 0.06  | 0.11  | -0.11 | 0.30  | 0.11 | -0.43 | -0.36 | -0.22 | 0.37  | 0.28  | 0.63  | 1.00  | 0.82  | -0.02 | 0.10  | 0.23  | -0.08 | -0.11 | -0.14 | -0.19 | 0.10  |       |       |       |       |
| TSW       |       | -0.09 | 0.40  | -0.34 | -0.14 | 0.04  | -0.05 | -0.06 | -0.18 | -0.08 | 0.29  | 0.14  | -0.20 | 0.10  | 0.14  | 0.04 | 0.09  | -0.05 |       | 0.02  | 0.11  | 0.77  | 0.70  | 1.00  | 0.02  | -0.04 | -0.17 | -0.06 | -0.09 | -0.13 | -0.18 | -0.02 |       |       |       |       |
| PH        | 0.06  | 0.06  | -0.23 | -0.03 | 0.11  | 0.41  | -0.39 | -0.53 | -0.25 | -0.04 | -0.03 | -0.05 | -0.16 | -0.08 | 0.07  | 0.43 | 0.37  | 0.19  |       | 0.12  | 0.05  | -0.28 | -0.29 | -0.06 | 1.00  | 0.16  | 0.28  | 0.29  | -0.13 | 0.38  | 0.38  | -0.09 | -0.29 |       |       |       |
| PL        | 0.11  | 0.10  | -0.34 |       | 0.16  | 0.18  | 0.03  | -0.08 | -0.45 | -0.52 | -0.04 | 0.08  | -0.19 | -0.24 | -0.08 | 0.02 | 0.05  | 0.28  | 0.10  | 0.20  | 0.05  | 0.10  | -0.03 | 0.04  | 0.11  | 0.27  | 1.00  | 0.59  | 0.59  | 0.08  | -0.02 | -0.05 | -0.21 |       |       |       |
| LBL       | -0.13 | -0.12 | -0.20 | 0.03  | 0.03  | 0.07  | 0.08  | -0.06 | -0.17 | -0.19 | -0.11 | 0.07  | 0.04  | -0.28 | -0.17 | 0.19 | -0.05 | -0.08 |       | 0.14  | -0.10 | 0.10  | -0.07 | 0.11  | 0.17  | 0.44  | 1.00  | 0.83  | 0.17  | 0.16  | -0.06 | -0.19 |       |       |       |       |
| LBW       | 0.25  | 0.27  | -0.27 | 0.04  | 0.08  | 0.34  | -0.30 | 0.18  | -0.48 | -0.46 | 0.20  | 0.10  | -0.07 | 0.16  | 0.03  | 0.13 | 0.43  | 0.49  | 0.47  | 0.36  | 0.18  | 0.07  | -0.16 | 0.18  | 0.27  | 0.14  | -0.26 | 1.00  | 0.03  | 0.19  | 0.18  | -0.07 | -0.20 |       |       |       |
| DF        | 0.20  | 0.21  | -0.21 | -0.13 |       | 0.16  | 0.19  | -0.23 | -0.22 | 0.18  | -0.42 | -0.28 | 0.09  | -0.13 | -0.35 | 0.16 | 0.33  | -0.26 | 0.16  |       |       | -0.06 | -0.18 | -0.17 | -0.15 | 0.25  | 0.18  | 0.04  | 1.00  | 0.14  | 0.06  | 0.21  | 0.11  |       |       |       |
| LC        | 0.14  | 0.20  | -0.32 | 0.05  | -0.08 | 0.11  | -0.09 | 0.10  | -0.38 | -0.33 | 0.09  | -0.11 | -0.20 | 0.03  | -0.16 | 0.28 | 0.53  | 0.23  | 0.29  | 0.28  | -0.26 | -0.06 | -0.27 | 0.01  | 0.37  | 0.22  | 0.22  | 0.37  | 0.44  | 1.00  | 0.73  | 0.06  | -0.12 |       |       |       |
| NFCC      | 0.06  | 0.10  | -0.48 | 0.05  | -0.04 | 0.04  | -0.02 | 0.34  | -0.41 | -0.36 | 0.26  | -0.08 | -0.13 | 0.07  | -0.19 | 0.23 | 0.34  | 0.69  | 0.36  | 0.41  | 0.41  | -0.29 | 0.03  | -0.34 | 0.10  | 0.17  | 0.15  | 0.18  | 0.40  | 0.49  | 0.79  | 1.00  | 0.08  | -0.11 |       |       |
| NCP       | -0.10 | -0.10 | 0.47  | 0.02  | -0.18 | -0.28 | 0.27  | -0.30 | 0.68  | 0.38  | -0.15 | 0.10  | -0.12 | -0.19 | 0.15  | 0.04 | -0.22 | -0.56 | -0.38 | -0.21 | 0.37  | -0.14 | 0.04  | 0.40  | 0.05  | -0.43 | 0.18  | 0.16  | -0.30 | -0.10 | 0.29  | -0.32 | 1.00  | 0.19  |       |       |
| GER       | 0.02  |       | -0.19 | -0.18 | 0.46  | 0.25  | -0.05 | -0.11 | -0.24 | -0.18 | 0.03  | 0.27  | -0.10 | 0.11  | -0.14 | 0.17 | 0.10  | 0.21  | 0.35  | 0.09  | 0.11  | -0.03 | -0.20 | 0.05  | 0.07  | 0.35  | 0.07  | 0.38  | -0.15 | 0.05  | 0.06  | -0.22 | 1.00  |       |       |       |

**Table S5.** Marker-trait associations for common buckwheat (*F. esculentum*) generated by general linear model (GLM) and mixed linear model (MLM) at  $p < 0.05$ .

| Trait                                        | Marker    | GLM      |                           | MLM      |                           |
|----------------------------------------------|-----------|----------|---------------------------|----------|---------------------------|
|                                              |           | <i>p</i> | <i>R</i> <sup>2</sup> (%) | <i>p</i> | <i>R</i> <sup>2</sup> (%) |
| Branched inflorescence                       | Ft3_572   | 0.001    | 34.23                     | 0.028    | 19.70                     |
|                                              | Ft4_2725  | 0.014    | 19.39                     | 0.001    | 30.29                     |
|                                              | Ft5_2899  | 1.40E-05 | 31.10                     | –        | –                         |
|                                              | Ft8_605   | 0.001    | 20.38                     | 0.005    | 19.27                     |
|                                              | SXAU138   | –        | –                         | 0.011    | 33.54                     |
| Compactness of inflorescence                 | Ft2_1743  | 0.007    | 15.55                     | –        | –                         |
| Colour of inflorescence stalk                | Fem1407   | 0.036    | 26.44                     | –        | –                         |
|                                              | Ft8_605   | 0.022    | 13.35                     | –        | –                         |
|                                              | SXAU089   | 0.050    | 43.18                     | –        | –                         |
| Cotyledon: anthocyanin coloration            | Ft3_572   | –        | –                         | 0.026    | 19.80                     |
|                                              | Ft4_2725  | 0.006    | 20.61                     | –        | –                         |
| Cotyledon/seedling leaf colour               | Ft4_2725  | 0.045    | 17.19                     | –        | –                         |
|                                              | TBP_5     | 0.046    | 13.21                     | –        | –                         |
| Days to flowering                            | Fem1840   | 0.042    | 27.19                     | –        | –                         |
| Flower colour                                | Fem1322   | –        | –                         | 0.009    | 37.81                     |
|                                              | Fem1407   | 0        | 37.54                     | –        | –                         |
|                                              | Fem1528   | –        | –                         | 0.009    | 39.32                     |
|                                              | Fem1840   | 0        | 40.40                     | –        | –                         |
| Growth and branch shoot habit                | TBP_5     | 0.013    | 14.93                     | –        | –                         |
|                                              | TBP_6     | 0.033    | 7.78                      | –        | –                         |
| Germination period                           | Ft5_2899  | 0.050    | 18.93                     | –        | –                         |
| Inflorescence: anthocyanin coloration of bud | Fem1840   | 0.025    | 30.49                     | –        | –                         |
|                                              | GB_FE_054 | 0.013    | 24.81                     | –        | –                         |
|                                              | GB_FE_121 | –        | –                         | 0.040    | 25.85                     |
| Leaf blade: intensity of green colour        | Ft4_2725  | 0.047    | 16.79                     | –        | –                         |
|                                              | Ft8_605   | 0.006    | 26.88                     | –        | –                         |
|                                              | SXAU060   | 0.041    | 13.84                     | –        | –                         |
| Leaf blade length                            | Ft5_2899  | 0.001    | 23.69                     | –        | –                         |
|                                              | SXAU048   | 0.002    | 42.18                     | –        | –                         |
|                                              | SXAU060   | 0.028    | 14.03                     | –        | –                         |
| Leaf blade shape                             | Ft8_605   | 0.037    | 23.43                     | –        | –                         |
| Leaf blade width                             | Fem1528   | 0.001    | 43.01                     | –        | –                         |
|                                              | Ft3_572   | 0.016    | 27.37                     | –        | –                         |
|                                              | Ft4_2725  | 0.018    | 18.04                     | –        | –                         |
|                                              | Ft5_2899  | 0.001    | 25.29                     | –        | –                         |
|                                              | SXAU048   | 0.014    | 38.95                     | –        | –                         |
|                                              | TBP6      | 0.013    | 8.85                      | –        | –                         |
| Length of cyme                               | Fem1407   | 0.040    | 29.34                     | –        | –                         |
| Leaf number                                  | Ft1_114   | 0.012    | 26.62                     | –        | –                         |
|                                              | SXAU060   | 0.040    | 14.09                     | –        | –                         |
| Number of cymes per plant                    | Fem1840   | 0.011    | 32.24                     | –        | –                         |
|                                              | Ft4_2725  | –        | –                         | 0.039    | 20.88                     |
|                                              | Ft5_2899  | 0.004    | 22.39                     | –        | –                         |
| Number of flowers clusters per cyme          | Fem1407   | 0.033    | 30.21                     | –        | –                         |



|                                        |           |          |       |          |       |
|----------------------------------------|-----------|----------|-------|----------|-------|
|                                        | Ft4_2725  | –        | –     | 0.023    | 22.41 |
|                                        | Ft5_2899  | 0.003    | 23.96 | –        | –     |
|                                        | Ft8_605   | 0.023    | 24.89 | –        | –     |
|                                        | SXAU129   | 0.020    | 36.10 | –        | –     |
| Plant height                           | Ft1_114   | 0.021    | 22.29 | –        | –     |
|                                        | Fem1528   | 0.007    | 41.42 | –        | –     |
| Petiole length                         | Ft5_2899  | 0.020    | 20.30 | –        | –     |
|                                        | SXAU048   | 0.040    | 37.76 | –        | –     |
|                                        | SXAU060   | 0.008    | 16.55 | –        | –     |
|                                        | Fem1322   | 0.013    | 31.24 | –        | –     |
|                                        | Ft1_114   | –        | –     | 0.041    | 15.52 |
|                                        | Ft2_1743  | 0.024    | 15.33 | –        | –     |
| Seed colour                            | Ft3_572   | –        | –     | 0.037    | 18.66 |
|                                        | Ft4_2725  | 0.015    | 18.67 | –        | –     |
|                                        | SXAU048   | 0.006    | 41.28 | –        | –     |
|                                        | SXAU138   | 0.022    | 21.84 | –        | –     |
| Stem: diameter                         | Ft1_114   | 0.029    | 24.96 | –        | –     |
|                                        | Ft8_605   | 0.002    | 18.97 | 0.010    | 17.97 |
|                                        | Fem1407   | –        | –     | 0.024    | 44.60 |
|                                        | Fem1528   | 0        | 47.59 | –        | –     |
|                                        | Fem1840   | 0.019    | 31.99 | –        | –     |
|                                        | Ft1_114   | 0.023    | 25.09 | –        | –     |
|                                        | Ft3_572   | –        | –     | 0.017    | 20.17 |
| Seed length                            | Ft4_2725  | 0.012    | 19.30 | –        | –     |
|                                        | Ft7_382   | 0.002    | 29.68 | –        | –     |
|                                        | GB_FE_035 | –        | –     | 0.023    | 21.72 |
|                                        | GB_FE_121 | 0.001    | 25.93 | –        | –     |
|                                        | TBP_5     | –        | –     | 0.049    | 7.49  |
|                                        | TBP_6     | 0.024    | 8.31  | –        | –     |
|                                        | Ft1_114   | 0.014    | 25.07 | –        | –     |
|                                        | Ft3_572   | 5.34E-08 | 42.82 | –        | –     |
| Stem: number of nodes                  | GB_FE_054 | –        | –     | 0.008    | 17.55 |
|                                        | SXAU138   | –        | –     | 3.68E-04 | 42.87 |
|                                        | TBP_5     | 0        | 20.30 | 0.004    | 11.49 |
|                                        | TBP_6     | 1.81E-04 | 13.68 | –        | –     |
| Stem: anthocyanin coloration           | Ft1_114   | 0.003    | 28.19 | –        | –     |
|                                        | SXAU129   | –        | –     | 0.026    | 27.77 |
|                                        | Ft1_114   | 0.002    | 28.93 | –        | –     |
| Stem colour                            | GB_FE_025 | –        | –     | 0.029    | 10.14 |
|                                        | GB_FE_035 | 0.014    | 10.39 | –        | –     |
|                                        | SXAU129   | –        | –     | 0.013    | 29.67 |
|                                        | Fem1303   | 0.035    | 16.70 | –        | –     |
| Seed width                             | Ft3_572   | –        | –     | 0.036    | 18.82 |
|                                        | Ft4_2725  | 0.003    | 21.21 | –        | –     |
|                                        | TBP_6     | 0.027    | 8.11  | –        | –     |
| Plant: total number of flower clusters | Fem1528   | 0.010    | 40.54 | –        | –     |
|                                        | Fem1407   | –        | –     | 0.044    | 43.45 |
| 1000-seed weight                       | Fem1528   | 0.004    | 43.12 | –        | –     |
|                                        | TBP_6     | 0.036    | 7.91  | –        | –     |

GLM, general linear model; MLM, linear mixed model;  $R^2$ , proportion of phenotypic variance explained by SSR markers.

**Table S6.** Marker-trait associations for Tartary buckwheat (*F. tataricum*) generated by general linear model (GLM) and mixed linear model (MLM) at  $p < 0.05$ .

| Trait                                        | Marker    | GLM      |           | MLM   |           |
|----------------------------------------------|-----------|----------|-----------|-------|-----------|
|                                              |           | $p$      | $R^2$ (%) | $p$   | $R^2$ (%) |
| Branched inflorescence                       | Fem1322   | 0.002    | 33.12     | –     | –         |
|                                              | Fem1407   | –        | –         | 0.020 | 63.94     |
|                                              | Ft1_114   | 0.035    | 8.09      | 0.028 | 48.58     |
|                                              | Ft2_1743  | 0.022    | 13.77     | –     | –         |
|                                              | Ft4_2725  | 0.001    | 44.02     | –     | –         |
|                                              | Ft5_2899  | 0.004    | 26.31     | –     | –         |
|                                              | GB_FE_054 | 0.009    | 22.54     | –     | –         |
|                                              | GB_FE_121 | 0.027    | 21.46     | –     | –         |
| Colour of inflorescence stalk                | SXAU129   | 0.011    | 25.17     | –     | –         |
|                                              | Ft4_2725  | 0.011    | 45.98     | –     | –         |
|                                              | Ft6_2849  | 0.026    | 26.70     | –     | –         |
|                                              | GB_FE_025 | 0.050    | 22.81     | –     | –         |
|                                              | GB_FE_121 | 0.026    | 24.87     | –     | –         |
|                                              | SXAU048   | 0.002    | 13.29     | –     | –         |
|                                              | SXAU060   | 0.002    | 24.04     | –     | –         |
|                                              | SXAU089   | –        | –         | 0.037 | 25.03     |
| Cotyledon: anthocyanin coloration            | TBP_5     | 0.004    | 19.97     | –     | –         |
|                                              | Fem1840   | 0.042    | 24.62     | –     | –         |
| Cotyledon/seedling leaf colour               | Ft7_382   | 0.025    | 33.52     | –     | –         |
|                                              | Fem1840   | 0.009    | 31.75     | –     | –         |
|                                              | Ft3_572   | 0.045    | 30.41     | –     | –         |
|                                              | Ft7_382   | 0.004    | 42.15     | –     | –         |
|                                              | SXAU089   | 0.043    | 17.87     | –     | –         |
| Days to flowering                            | Fem1528   | 0.026    | 53.60     | –     | –         |
|                                              | Ft6_2849  | 7.03E-06 | 61.21     | –     | –         |
|                                              | Ft7_382   | –        | –         | 0.033 | 46.96     |
|                                              | GB_FE_025 | 0.032    | 33.75     | –     | –         |
| Germination period                           | Fem1303   | 0.017    | 14.68     | –     | –         |
|                                              | Fem1322   | –        | –         | 0.028 | 14.68     |
|                                              | SXAU138   | 0.041    | 64.57     | –     | –         |
| Inflorescence: anthocyanin coloration of bud | Fem1840   | 4.03E-04 | 36.72     | –     | –         |
|                                              | Ft5_2899  | 0.020    | 29.90     | –     | –         |
|                                              | SXAU048   | 0.016    | 9.41      | –     | –         |
| Leaf blade length                            | Ft6_2849  | 0.029    | 36.29     | –     | –         |
| Leaf blade shape                             | SXAU060   | 0.009    | 27.46     | –     | –         |
|                                              | SXAU089   | 0.003    | 28.88     | –     | –         |
|                                              | SXAU129   | –        | –         | 0.027 | 23.86     |
| Length of cyme                               | Fem1407   | 0.007    | 38.01     | –     | –         |
|                                              | Ft4_2725  | 0.002    | 55.99     | –     | –         |
|                                              | Ft6_2849  | 0.008    | 33.56     | –     | –         |
|                                              | Ft7_382   | 0.037    | 28.54     | –     | –         |
| Leaf margin colour                           | Ft5_2899  | 0.031    | 31.38     | –     | –         |
|                                              | GB_FE_035 | 0.001    | 22.23     | –     | –         |

|                                     |           |          |       |       |       |
|-------------------------------------|-----------|----------|-------|-------|-------|
|                                     | GB_FE_054 | 0.030    | 29.13 | –     | –     |
|                                     | GB_FE_121 | 0.028    | 31.77 | –     | –     |
|                                     | GB_FE_121 | –        | –     | 0.017 | 16.60 |
| Leaf number                         | SXAU089   | 0.008    | 21.33 | –     | –     |
| Lodging susceptibility              | Fem1840   | 0.008    | 27.72 | –     | –     |
|                                     | Ft2_1743  | 0.009    | 20.50 | –     | –     |
|                                     | Ft4_2725  | 0.039    | 48.27 | –     | –     |
|                                     | Ft5_2899  | 0.004    | 34.11 | –     | –     |
|                                     | GB_FE_054 | 0.009    | 29.83 | –     | –     |
|                                     | SXAU048   | 0.001    | 15.33 | –     | –     |
|                                     | SXAU060   | 0.021    | 20.25 | –     | –     |
|                                     | TBP_5     | 0.007    | 21.26 | –     | –     |
| Leaf vein colour                    | Ft3_572   | 0.002    | 45.61 | –     | –     |
|                                     | Ft4_2725  | 0.029    | 62.73 | –     | –     |
|                                     | Ft5_2899  | 0.049    | 33.00 | –     | –     |
|                                     | Ft6_2849  | 0.002    | 48.48 | –     | –     |
|                                     | Ft7_382   | 0.018    | 40.27 | –     | –     |
|                                     | SXAU048   | 0.018    | 11.29 | –     | –     |
|                                     | SXAU060   | 0.023    | 25.36 | –     | –     |
| Number of cymes per plant           | Ft2_1743  | 1.50E-04 | 29.21 | –     | –     |
|                                     | Ft5_2899  | 1.26E-04 | 39.84 | –     | –     |
|                                     | GB_FE_054 | 1.92E-04 | 37.11 | –     | –     |
|                                     | SXAU048   | 0.029    | 7.13  | –     | –     |
|                                     | TBP_5     | 0.004    | 21.05 | –     | –     |
| Number of flowers clusters per cyme | Fem1322   | 0.001    | 36.54 | –     | –     |
|                                     | Fem1407   | 0.040    | 26.62 | –     | –     |
|                                     | Fem1407   | –        | –     | 0.039 | 49.07 |
|                                     | Ft5_2899  | 0.014    | 24.87 | –     | –     |
|                                     | Ft6_2849  | 0.001    | 32.30 | –     | –     |
|                                     | Ft7_382   | –        | –     | 0.038 | 39.58 |
|                                     | Ft8_605   | 0.050    | 14.50 | –     | –     |
|                                     | SXAU138   | 0.044    | 45.47 | –     | –     |
|                                     | TBP6      | –        | –     | 0.022 | 22.61 |
| Petiole colour                      | Fem1407   | 0.043    | 30.19 | –     | –     |
|                                     | Fem1528   | 0.019    | 45.62 | –     | –     |
|                                     | SXAU048   | 0.008    | 10.22 | –     | –     |
|                                     | TBP_5     | 0.045    | 14.27 | –     | –     |
| Plant height                        | Fem1840   | 0.016    | 29.98 | –     | –     |
|                                     | Ft2_1743  | 0.029    | 19.74 | –     | –     |
|                                     | Ft1_114   | –        | –     | 0.004 | 67.43 |
| Seed colour                         | Ft2_1743  | 1.38E-05 | 39.72 | –     | –     |
|                                     | Ft5_2899  | 0.002    | 42.36 | –     | –     |
|                                     | Ft6_2849  | –        | –     | 0.013 | 51.89 |
|                                     | Ft7_382   | 0.049    | 32.33 | –     | –     |
|                                     | Ft8_605   | –        | –     | 0.010 | 58.44 |
|                                     | SXAU129   | 1.02E-05 | 57.09 | –     | –     |
| Stem diameter                       | GB_FE_025 | 0.041    | 22.31 | –     | –     |
| Seed length                         | Fem1840   | 0.016    | 30.96 | –     | –     |
|                                     | Ft3_572   | 2.28E-04 | 49.82 | –     | –     |

|                                        |           |          |       |       |       |
|----------------------------------------|-----------|----------|-------|-------|-------|
|                                        | Ft4_2725  | 0.036    | 58.53 | 0.029 | 40.09 |
|                                        | Ft5_2899  | 0.033    | 33.05 | –     | –     |
|                                        | Ft7_382   | 0.002    | 46.16 | –     | –     |
|                                        | GB_FE_054 | 0.002    | 41.55 | –     | –     |
|                                        | TBP_5     | 0.001    | 30.81 | –     | –     |
| Stem: number of nodes                  | Fem1322   | 0.012    | 21.53 | –     | –     |
|                                        | Fem1407   | 0.048    | 17.72 | –     | –     |
|                                        | Fem1840   | 0.017    | 14.17 | –     | –     |
|                                        | Ft2_1743  | 9.35E-12 | 32.04 | –     | –     |
|                                        | Ft3_572   | 0.002    | 20.05 | –     | –     |
|                                        | Ft4_2725  | 0.033    | 27.24 | –     | –     |
|                                        | Ft5_2899  | 1.03E-04 | 24.00 | –     | –     |
|                                        | Ft6_2849  | 8.02E-06 | 27.71 | –     | –     |
|                                        | Ft7_382   | 0.001    | 23.06 | 0.021 | 51.72 |
|                                        | GB_FE_054 | 0.008    | 16.64 | –     | –     |
|                                        | SXAU060   | 0.003    | 14.32 | –     | –     |
|                                        | SXAU138   | –        | –     | 0     | 60.20 |
| Stem: anthocyanin coloration           | GB_FE_035 | 0.014    | 14.78 | –     | –     |
| Seed shape                             | Fem1528   | 0.019    | 30.58 | –     | –     |
|                                        | Fem1840   | 0.005    | 19.59 | 0.048 | 74.08 |
|                                        | Ft2_1743  | –        | –     | 0.031 | 15.01 |
|                                        | Ft5_2899  | 2.86E-04 | 27.09 | –     | –     |
|                                        | GB_FE_025 | 0.013    | 20.26 | –     | –     |
|                                        | GB_FE_035 | –        | –     | 0.013 | 49.62 |
|                                        | SXAU048   | 0.010    | 6.96  | 0.048 | 31.55 |
|                                        | SXAU060   | 0.009    | 15.16 | –     | –     |
| Seed width                             | Fem1322   | 0.025    | 42.32 | –     | –     |
|                                        | Fem1407   | 0.041    | 38.03 | –     | –     |
|                                        | Ft4_2725  | 6.57E-05 | 73.18 | –     | –     |
|                                        | GB_FE_054 | 2.24E-08 | 64.39 | –     | –     |
|                                        | TBP_5     | 4.66E-07 | 49.77 | –     | –     |
| Plant: total number of flower clusters | Fem1840   | 0.011    | 33.93 | –     | –     |
|                                        | Ft4_2725  | 0.045    | 60.03 | –     | –     |
|                                        | Ft7_382   | 0.029    | 37.54 | –     | –     |
| 1000-seed weight                       | Fem1322   | –        | –     | 0.020 | 17.73 |
|                                        | Fem1407   | 0.006    | 45.93 | –     | –     |
|                                        | Fem1840   | 0.033    | 27.57 | –     | –     |
|                                        | Ft3_572   | 0.002    | 43.00 | –     | –     |
|                                        | Ft4_2725  | 2.66E-04 | 71.63 | –     | –     |
|                                        | Ft5_2899  | 0.013    | 36.29 | –     | –     |
|                                        | Ft7_382   | 0.003    | 43.72 | –     | –     |
|                                        | GB_FE_054 | 0.010    | 34.98 | –     | –     |
|                                        | TBP_5     | 0.004    | 27.27 | –     | –     |

GLM, general linear model; MLM, linear mixed model;  $R^2$ , proportion of phenotypic variance explained by SSR markers.
